# Supplementary material
Source: PubMed Central journal article supplement (PMC3069118)

TLR2 RE#4

This RE is located -656 bp from TSS

```

RRRCWWGYYYnnnnnnnnnnRRRCWWGYYY
AATAGCACTGAAACAAGaTctaccctatatGGGCATGTCCCTATTAACAA    Positive strand
n=11
TTGTTAATAGGGACATGCCCatataggggtaGAtCTTGTTTCAGTGCTATT    Negative strand
    
```

Chromosome coordinates: Ensembl Genome Browser: 4: 154621975-154622005

154621940 GATAGAMAAATGAACATTGGATCAGAATAGCACTGAAACAAGATCTACCCCTATATGGGCATGTCCCTATTAACA 154622014

Sequence alignment and conservation in primates and rodents

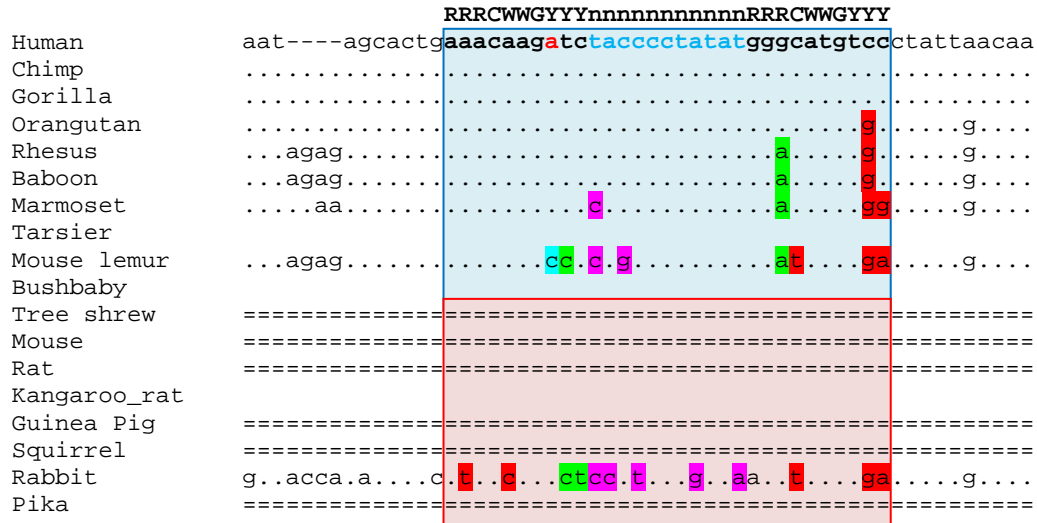

TLR3 RE#4

This RE is located -1929 from TSS

RRRCWWGYYYRRRCWWGYYY  
 CTGAGACTATAGGCATGCACCAACATGCCAGCTAATTTT Positive strand Full RE Sp:0 2MM(1:1)  
 AAAATTAGCTGGGCATGTTGGTGCATGCCTATAGTCTCAG Negative strand

Chromosome coordinates: Ensembl Genome Browser: 4: 186988380-186988399

186988309 TCAATGCAAACCTTGAATTTGCCTGGACTCAAGTGATCCTCCCACCTCAGCCTCCCAAGTAGCTGAGACTATAGGC 186988383  
 186988384 ATGCACCAACATGCCAGCTAATTTTGTAAATTTTGTAGAGATGGAGTTTTACCACGTTGCCAGGTTGGTCTT 186988458

Sequence alignment and conservation in primates and rodents

|              | RRRCWWGYYYRRRCWWGYYY                                                                         |
|--------------|----------------------------------------------------------------------------------------------|
| Human        | ctgagactatag <sup>g</sup> catgc <sup>a</sup> c <sup>c</sup> aacatgcccagc <sup>t</sup> aatttt |
| Chimp        | .....t.....                                                                                  |
| Gorilla      | .....t.....                                                                                  |
| Orangutan    | .....t.....                                                                                  |
| Rhesus       | .....c.....t.....t.....ct.ca.....c.....                                                      |
| Baboon       | .....c.....t.....t.....ct.ca.....                                                            |
| Marmoset     | ...g.....c.....g.....ct.....                                                                 |
| Tarsier      | .c.ga....c.....catg....c..c.t.tg.....                                                        |
| Mouse lemur  | =====                                                                                        |
| Bushbaby     | =====                                                                                        |
| Tree shrew   | =====                                                                                        |
| Mouse        | =====                                                                                        |
| Rat          | =====                                                                                        |
| Kangaroo rat | =====                                                                                        |
| Guinea Pig   | -----                                                                                        |
| Squirrel     | =====                                                                                        |
| Rabbit       | =====                                                                                        |
| Pika         | -----                                                                                        |

TLR4 RE#2

This RE is located -2354 from TSS

RRRCWWGYYYnnRRRCWWGYYY  
 AGTGTGCATAAGGCATGCTCcaGAGCAAgtCTTTTGCTATTT Positive strand Full RE Sp:2 1MM (0:1)  
 AAATAGCAAAAAGAtTTGCTCtgGAGCATGCCTTATGCACACT Negative strand

Chromosome coordinates: Ensembl Genome Browser: 9: 120464256-120464277  
 120464235 CTGGATTGCYTAGTGTGCATAAGGCATGCTCcaGAGCAAATCTTTTGCTATTTTTAGAACTAACTAGCCCTGGT 120464309

Sequence alignment and conservation in primates and rodents

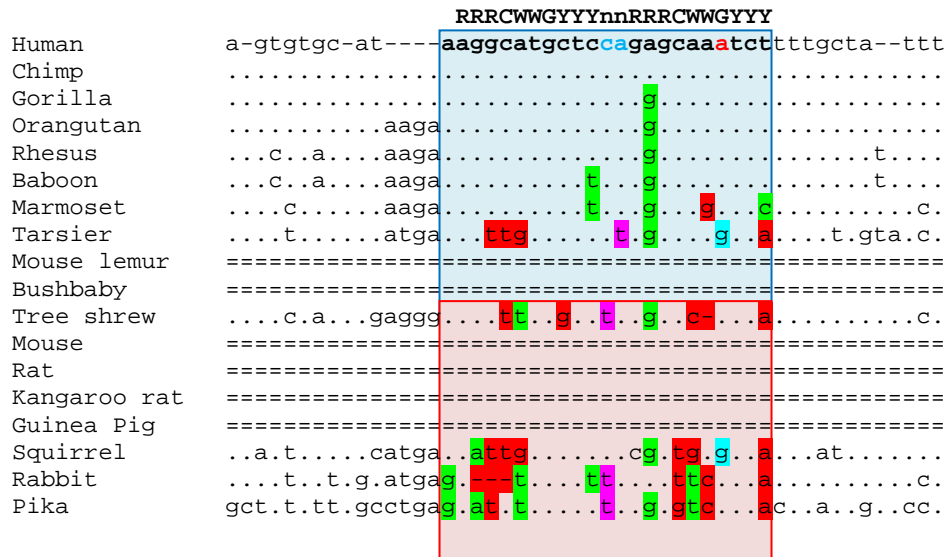

Figure S8 (continuation)

TLR5 RE#3

This RE is located -832 from TSS\*

\*(originally two different transcription sites were reported, those TSS are separated by 5995bp, the coordinates of this p53RE is relative to the second TSS (Chr 1: 223310629). The first TSS is located at Chr 1: 223316624.

RRRCWWGYYYYRRRCWWGYYY  
 AAAATATCTGGGCATGgTgGcACATGCCTATAGCCCCAG Positive strand Full RE Sp:0 2/3MMs (2:1/0) \*SNP  
 CTGGGGCTATAGGCATGTgCcAcCATGCCAGATAATTTT Negative strand

Chromosome coordinates: Ensembl Genome Browser: 1: 223311442 -223311461  
 223311499 GACCCCTCCACCCCCACCCCCACACACAAAAATTATCTGGGCATGGTGGYACATGCCTATAGCCCCAGCTACTCC 223311425

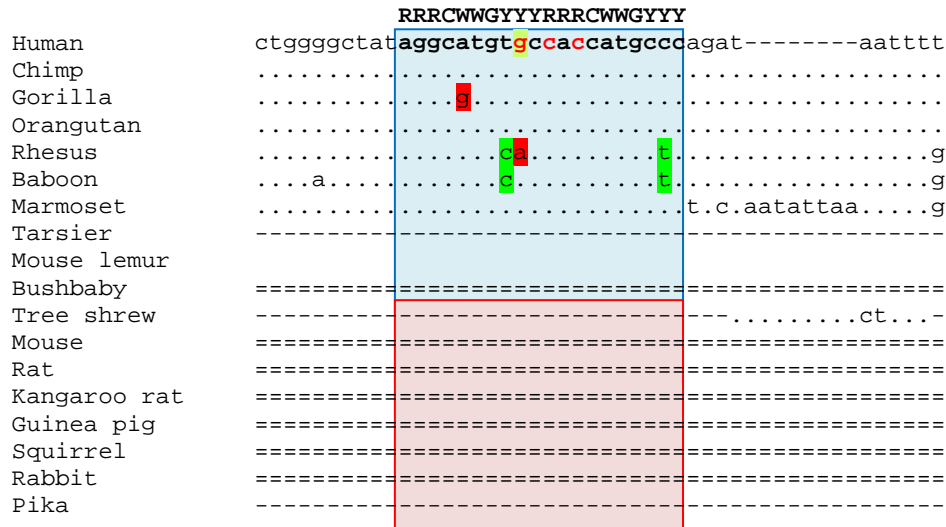

TLR5 RE#3 more information

SNP: 223311450: rs2192617 C/T (source dbSNP 130)

For population diversity and detailed information of this SNP click the following link [dbSNP 130: rs2192617](http://www.ncbi.nlm.nih.gov/SNP/snp_ref.cgi?rs=rs2192617)  
 (http://www.ncbi.nlm.nih.gov/SNP/snp\_ref.cgi?rs=rs2192617)

TLR5 reported transcripts(source Ensembl, currently release 57 - Mar 2010):

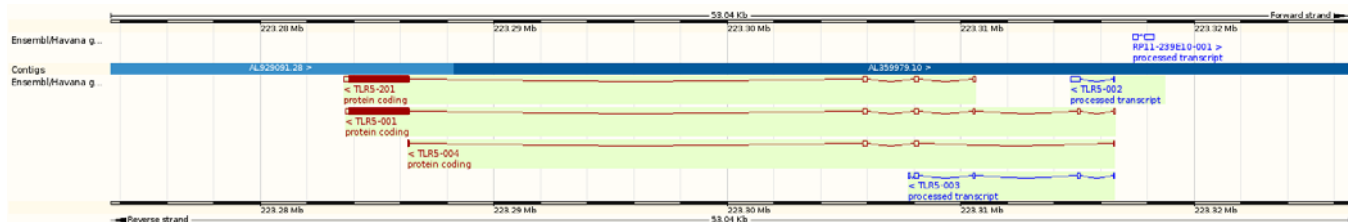

Figure S8 (continuation)

TLR6 RE#6

This RE is located -1332 from TSS\*

\*(originally two different transcription sites were reported, those TSS are separated by 27278bp, the coordinates of this p53RE is relative to the second TSS (Chr 4: 38831160). The first TSS is localted at Chr 4: 38858438.

```

RRRCWGWYYYnnRRRCWGWYYYnnRRRCWGWYYY
ACGTAGAGCAAGTCCactGGCAAaTCTggGGCTAGTgaTTATT      Positive strand
AATAAtcACTAGCCCccAGAtTTGCCagtGGACTTGCTCTACGT      Negative strand
    
```

Chromosome coordinates: Ensembl Genome Browser: 4: 38832459 -38832492

```

38832538 TCCATTGCTTTTTTGCAAGGTTTGTGTTATTTTCAGGGCAAACRTARAGCAAGTCCACTGGCAAATCTGGGGGCT 38832464
38832463 AGTGAATTATTTGTTTTGATTTTTATTTTTTAAATCAGACATTTTAAACACTACAATGAGGTAMCTCTARAAAT 38832389
    
```

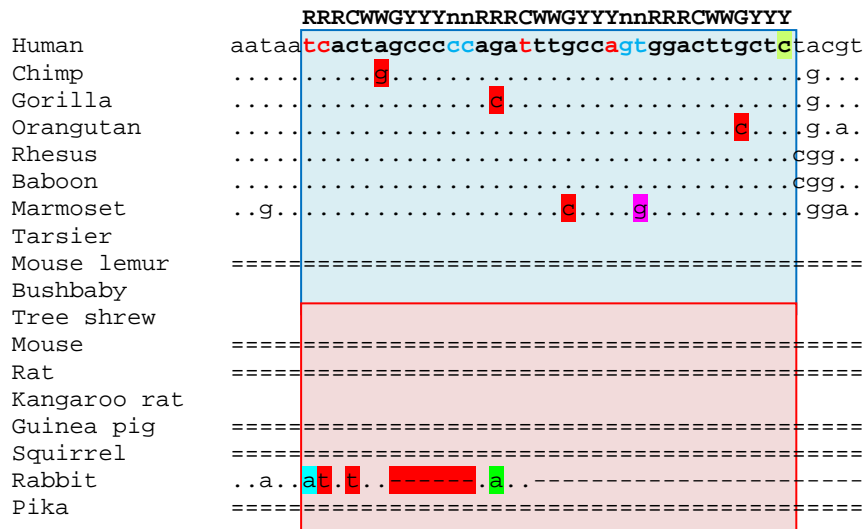

TLR6 RE#6 more information

SNP: 38832492: rs167251 G/A (source dbSNP 130)

For population diversity and detailed information of this SNP click the following link [dbSNP 130: rs167251](http://www.ncbi.nlm.nih.gov/SNP/snp_ref.cgi?rs=rs167251) (http://www.ncbi.nlm.nih.gov/SNP/snp\_ref.cgi?rs=rs167251)

TLR6 reported transcripts (source Ensembl, currently release 57 - Mar 2010):

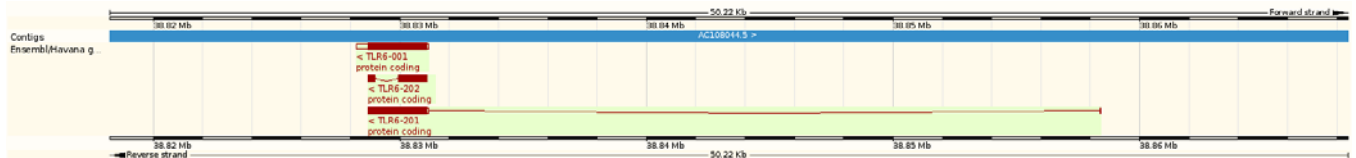



TLR8 RE#6

This RE is located -1074 from TSS

RRRCWWGYYYRRRCWWGYYY  
 CTGGGGTGTAAGGCAAGaTgAAACATaTCaCATCCCGTTC Positive strand Full RE Sp:0 3/4MM (2:1/2)\*SNP  
 GAACGGGATgtGATATGTTTcaTCTGCCTTACACCCAG Negative strand

Chromosome coordinates: Ensembl Genome Browser: X: 12923665 -12923684

12923639 TGGTTTTCTCCCACTCCTGGGGTGTAAGGCAAGATGAAACATaTCaCATCCCGTTCTAAACTTTATTCTTGTGGC 12923713

|              | RRRCWWGYYYRRRCWWGYYY                       |
|--------------|--------------------------------------------|
| Human        | ctgggg---tgtaaggcaagatgaaacatatacatcccgttc |
| Chimp        | .....                                      |
| Gorilla      |                                            |
| Orangutan    | .....a...                                  |
| Rhesus       | .....a...                                  |
| Baboon       | .....a...                                  |
| Marmoset     | .....a...                                  |
| Tarsier      | =====                                      |
| Mouse lemur  | ga...a...a-.tt.c.tca...-----               |
| Bushbaby     | ta.....g.t.....a.....c.t....t.tc..         |
| Tree shrew   | aat.....c.t.g.g...a...                     |
| Mouse        | ag.a..ctc.a..gaa..gag-----c.t.ac..         |
| Rat          | =====                                      |
| Kangaroo rat |                                            |
| Guinea pig   | =====                                      |
| Squirrel     | ag.....a..aa...tg.....c..t.t...t.a...      |
| Rabbit       |                                            |
| Pika         | =====                                      |

TLR8 RE#6 more information

SNP: 12923681: rs3761624 A/G (source dbSNP 130)

For population diversity and detailed information of this SNP click the following link [dbSNP 130: rs3761624](http://www.ncbi.nlm.nih.gov/SNP/snp_ref.cgi?rs=rs3761624) (http://www.ncbi.nlm.nih.gov/SNP/snp\_ref.cgi?rs=rs3761624)



Figure S8 (continuation)

TLR9 RE#14

This RE is located -720 from TSS\*

\*(originally two different transcription sites were reported, those TSS are separated by 13004bp, the coordinates of this p53RE is relative to the first TSS (Chr 3: 52273183 now assigned for TWF2 gene). The second TSS is located at Chr 3: 52260179.

The distance between the two regions (each region 10kb) analyzed is 2956bp

RRRCWWGYYRRRCWWGYYY  
 AAAATTAGCCAGGCATGgTggtGCATGCCTGTAATCCTAA Positive strand Full RE Sp:0 3MM (2:1)  
 TTAGGATTACAGGCATGCaCaAcCATGCCTGGCTAATTTT Negative strand

Chromosome coordinates: Ensembl Genome Browser: 3: 52273914-52273933

52273983 ACTGACCAACATAGAGAAACCCCGTCTCTACTAAAATACAAAATTAGCCAGGCATGGTGGTGCATGCCTGTAATCCTAA 52273909

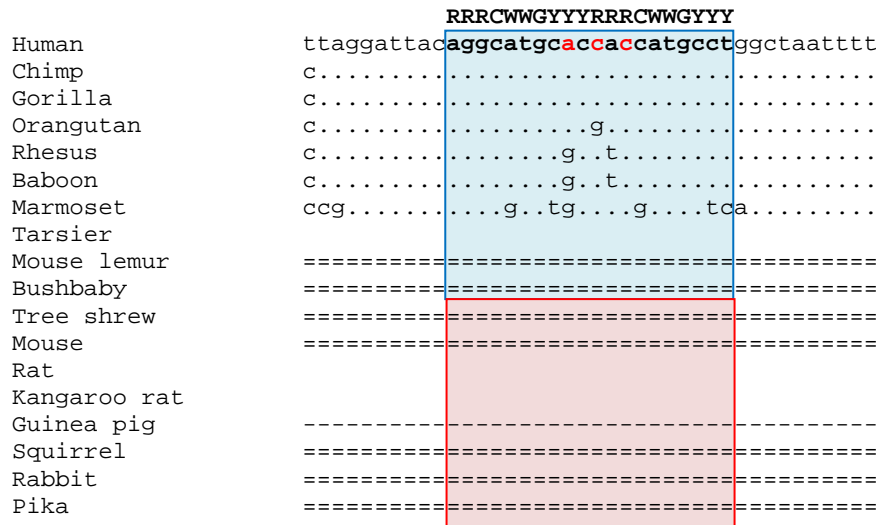

TLR9 reported transcripts (source Ensembl, currently release 57 - Mar 2010):

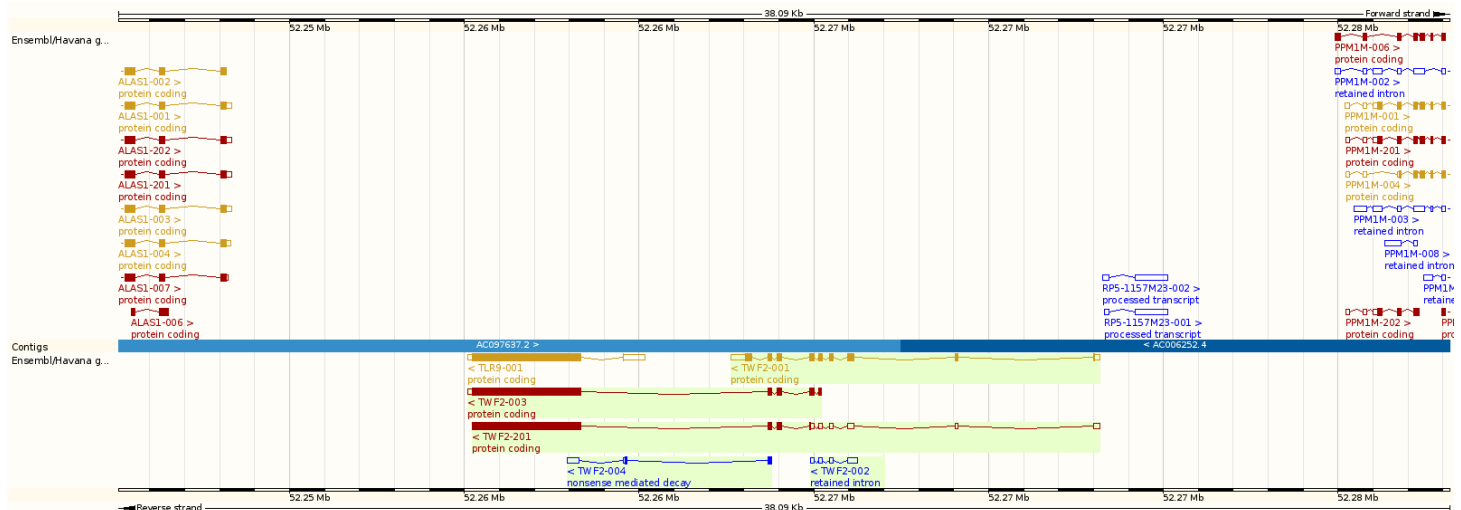

TLR10 RE#4

This RE is located -2226 from TSS

RRRCWWGYYYRRRCWWGYYY  
 TGTGTAATATAGACATGTTTGTAtATGTTTAGGTTGAGGAG Positive strand Full RE Sp:0 2MM (0:2)  
 CTCCTCACCTAAACATaTaaAACATGTCTATATTACACA Negative strand

Chromosome coordinates: Ensembl Genome Browser: 4: 38786796-38786815  
 38786889 TCATCCAACAAGCTGGGAATMCCCTCTCCAACGTTCCCTGACGGGTGTTCCCTGTCTTCCCTACGTTTGTGTAATATA 38786815  
 38786814 GACATGTTTGTATATGTTTAGGTTGAGGAGCAGAGCTGGTTTTGTTTTGCTGTTGTTTTTCTTTTACAGTTATTT 38786740

Sequence alignment and conservation in primates and rodents

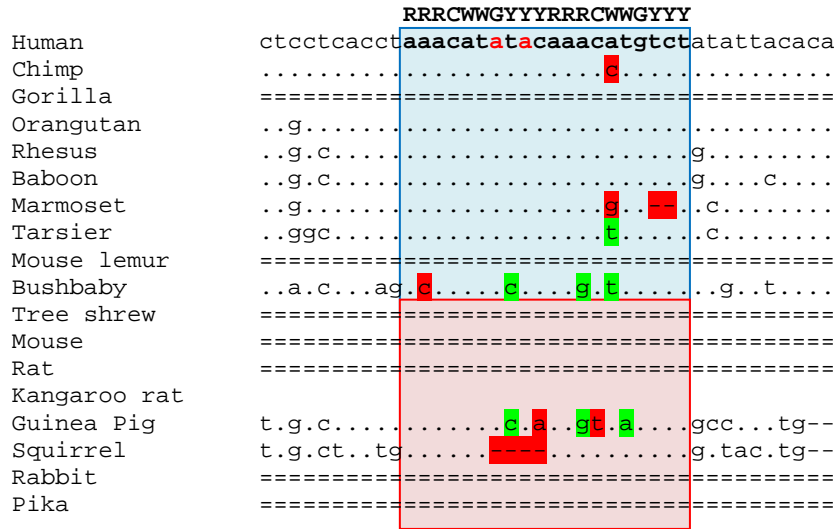

Supplement: pgen.1001360.s008.pdf [file pgen.1001360.s008.pdf]
